# Supplementary material for: Sequence-encoded quantitative invader assay enables highly sensitive hepatitis B virus DNA quantification in a single tube without the use of a calibration curve
Source: Royal Society of Chemistry journal article supplement (doi:10.1039/c9an00970a), 2019-01-01
Supplement: c9an00970a1.pdf [file c9an00970a1.pdf]

## Supplementary Information

### Sequence-encoded Quantitative Invader assay enables highly sensitive hepatitis B virus

#### DNA quantification in a single tube without the use of a calibration curve

Nan Sheng,<sup>‡a</sup> Bingjie Zou,<sup>‡b</sup> Huan Tong,<sup>b</sup> Yan Lu,<sup>b</sup> Sixi Xing,<sup>c</sup> Qinxin Song<sup>\*b, c</sup> and Guohua Zhou<sup>\*a, b, d, e</sup>

<sup>a</sup> School of Life Science and Technology, China Pharmaceutical University, Nanjing 210009, China.

<sup>b</sup> Department of Pharmacology, Jinling Hospital, Medical School of Nanjing University, Nanjing 210002, China.

<sup>c</sup> Key Laboratory of Drug Quality Control and Pharmacovigilance, Ministry of Education, School of Pharmacy, China Pharmaceutical University, Nanjing 210009, China.

<sup>d</sup> Department of Chemistry, State Key Laboratory of Analytical Chemistry for Life Science, Nanjing University, Nanjing 210093, China.

<sup>e</sup> School of Pharmaceutical Sciences, Southern Medical University, Guangzhou 510515, China.

\* Corresponding Author:

Guohua Zhou, Tel/ Fax: (86) 25-80860196, E-mail: ghzhou@nju.edu.cn

Qinxin Song, Tel/ Fax: (86) 25-80860196, E-mail: songqinxin@cpu.edu.cn

‡ Nan Sheng and Bingjie Zou contributed equally to this work.

## TABLE OF CONTENTS

1. Figure S1: Amplification efficiencies of HBV-DNA and QS-DNA.
2. Figure S2: Sequence of the artificially designed quantitative-standard.
3. Figure S3: Electrophoregram of products from the invasive reaction with various components.
4. Figure S4: Amplification profiles of HBV-DNA with different amounts of FEN1.
5. Figure S5: Amplification profiles of HBV-DNA with different amounts of *Taq* DNA polymerase.

6. Figure S6: Amplification profiles of various concentration of HBV-DNA with different copies of QS-DNA.
7. Figure S7: Amplification profiles of sQ-Invader (**a**) and TaqMan probe-based qPCR (**b**) for detecting HBV-DNA ranging from 2 to 40 copies per reaction.
8. Figure S8: Relationship between the expected concentrations and the observed concentrations of HBV-DNA using Equation (6) for quantification.
9. Figure S9: Amplification profiles of HBV-DNA serum standard.
10. Figure S10: Amplification profiles of various plasmid DNAs of other virus genes.
11. Figure S11: Amplification profiles of representative clinical samples.
12. Table S1: Calculated E values.
13. Table S2: The precision of intra-assay.
14. Table S3: The precision of inter-assay.
15. Table S4: Ct values of samples tested by sQ-Invader and TaqMan probe-based qPCR

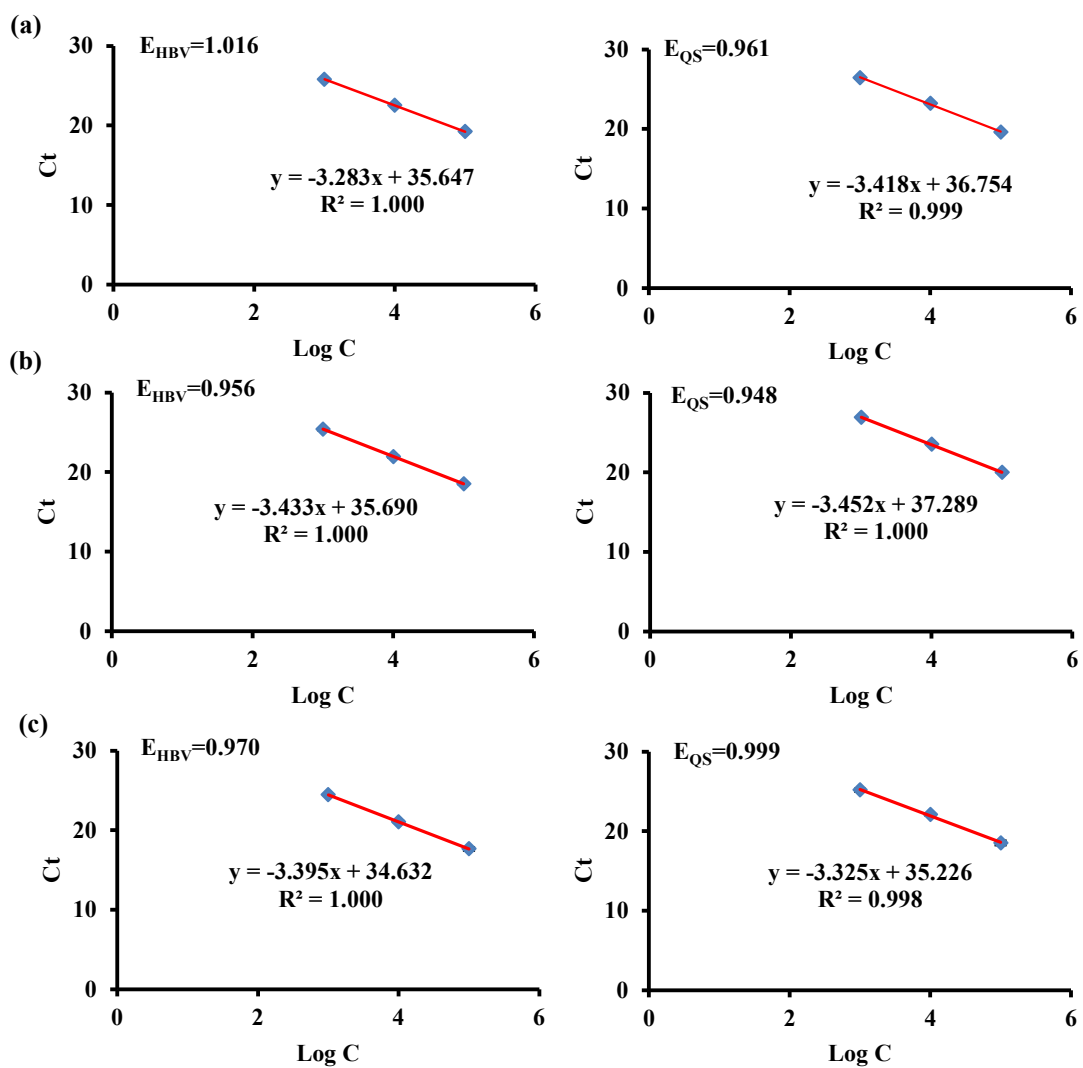

**Fig. S1** Amplification efficiencies of HBV-DNA (left-side) and QS-DNA (right-side) in a 20- $\mu$ L reaction system by amplifying the S gene (a), C gene (b) and simultaneous amplifying multiple genes (c). N=3.

5'- CTG GAT GTG TCT GCG GCG TTT TAT CAT CTT CCT CTT CAT CCT GCT GCT  
 ATG CCT CAT CT A CTT C TT GGT T G T TCT GGA CTA TCA AGG TAT GTT GCC  
 CGT TTG TCC TCT AGG AGG CTG TAG GCA TAA ATT GGT CTG TTC ACC AGC  
 AGC ATG CAA CTT TTT CAC CTC T C G TA ATC T TC TCT TGT TCA TGT CCT  
 ACT GTT CAA GCC TCC AAG CTG TGC CTT GGG TGG CTT TG -3'

**Fig. S2** Sequence of the artificially designed quantitative-standard. The underlined sequences were identical or reverse complementary to the DP-QS probe. The boxed bases were altered based on the HBV-DNA template according to Watson-Crick base pairing.

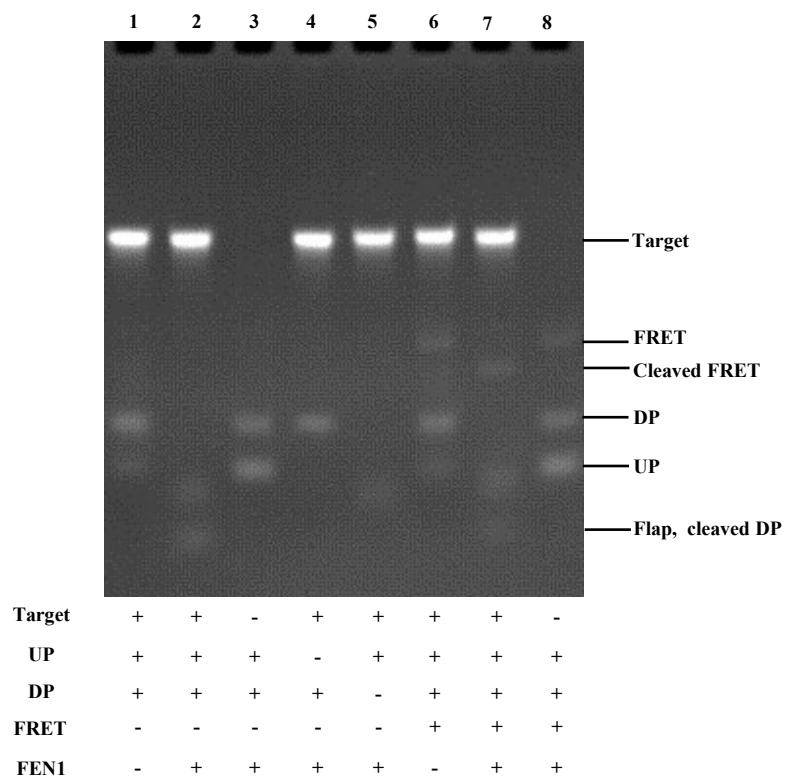

**Fig. S3** Electrophoregram of products from the invasive reaction with various components. Lane 1: invasive reaction without FEN1, lane 2: normal invasive reaction, lane 3-5: invasive reaction without target, UP and DP, respectively, lane 6: cascade invasive reactions without FEN1, lane 7: normal cascade invasive reactions, lane 8: cascade invasive reactions without target.

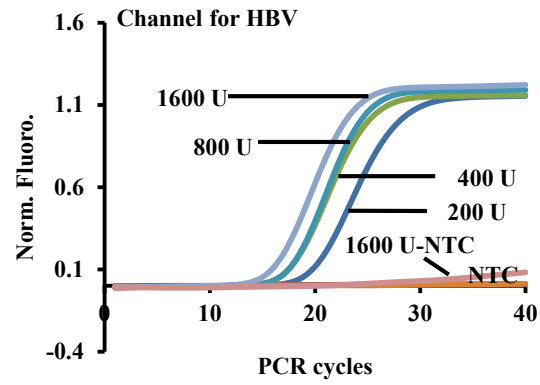

**Fig. S4** Amplification profiles of  $1 \times 10^3$  copies of HBV-DNA in a 20- $\mu$ L reaction system by adding different amounts of FEN1 (200 U, 400 U, 800 U and 1600 U). NTC was no target control, the reaction without a target.

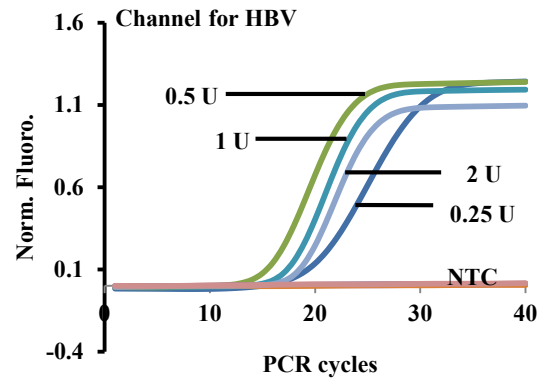

**Fig. S5** Amplification profiles of  $1 \times 10^3$  copies of HBV-DNA in a 20- $\mu$ L reaction system by adding different amounts of *Taq* DNA polymerase (0.25 U, 0.5 U, 1 U and 2 U). NTC was no target control, the reaction without a target.

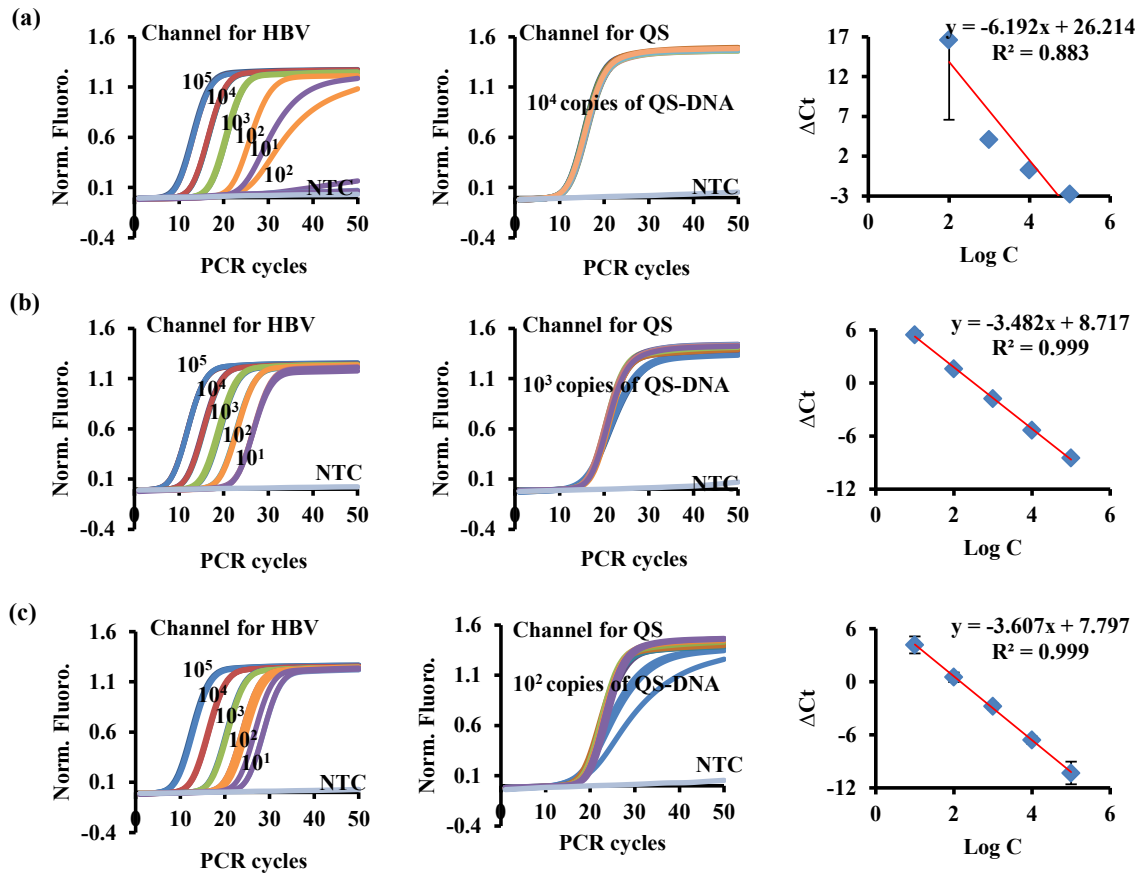

**Fig. S6** Amplification profiles from the channel for HBV-DNA (left side) and the channel for QS-DNA (middle) by individually spiking  $1 \times 10^4$  (a),  $1 \times 10^3$  (b), and  $1 \times 10^2$  (c) copies of QS-DNA into the tubes with HBV-DNA ranging from 10 to  $1 \times 10^5$  copies in a 20- $\mu$ L reaction system, and the quantitative relationship between  $\Delta Ct$  and the Log C (right side). NTC was no target control, the reaction without a target. N=3.

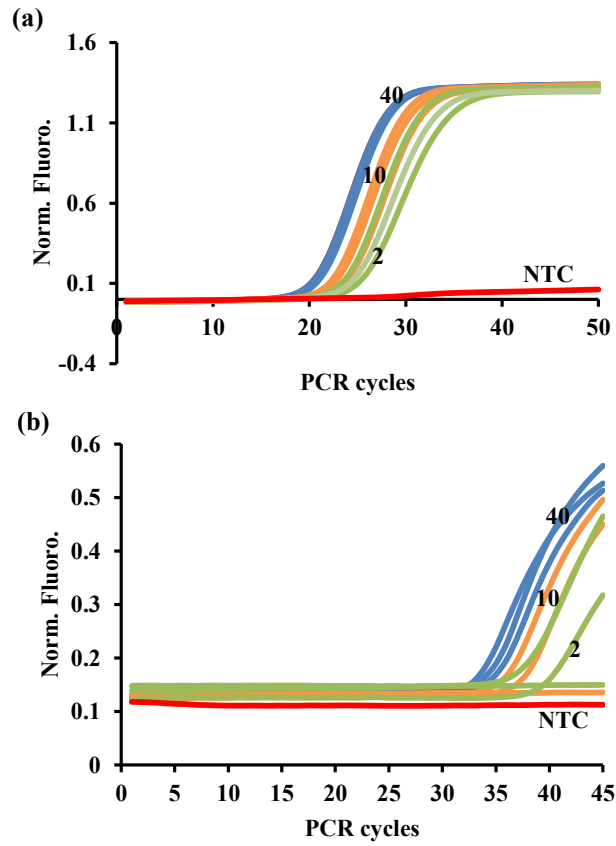

**Fig. S7** Amplification profiles of sQ-Invader (a) and TaqMan probe-based qPCR (b) for detecting HBV-DNA ranging from 2 to 40 copies per reaction. NTC was no target control, the reaction without a target. N=3.

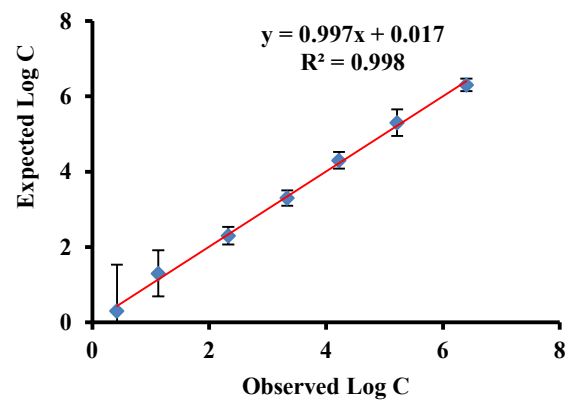

**Fig. S8** Relationship between the expected concentrations and the observed concentrations of HBV-DNA by using Equation (6) for quantification. N=3.

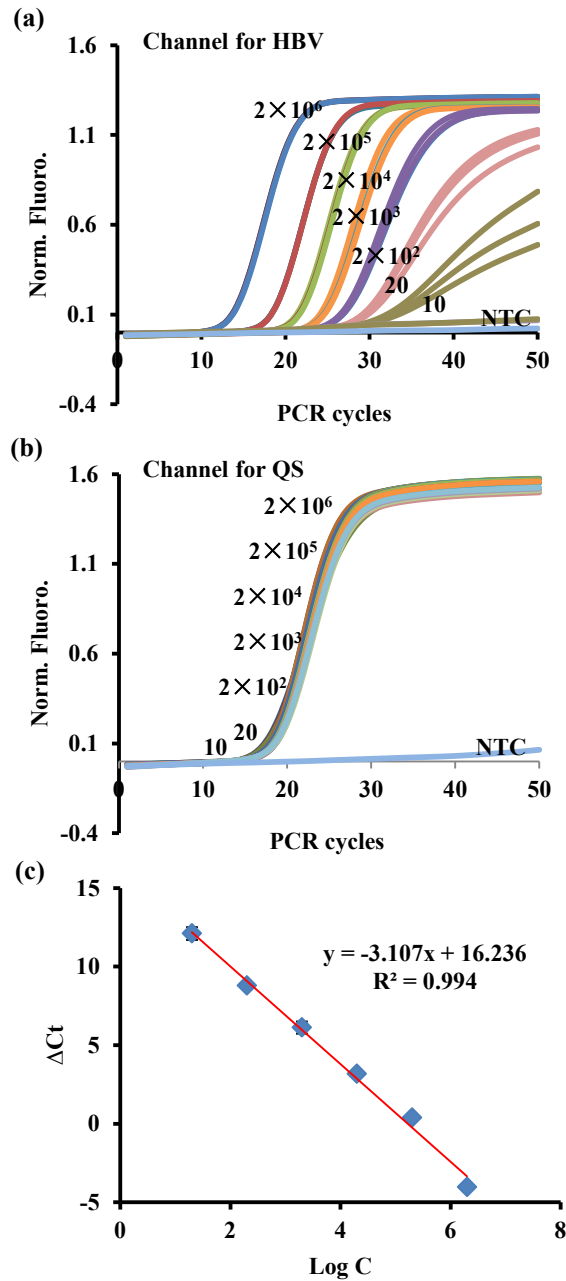

**Fig. S9** Amplification profiles from the channel for HBV-DNA (a) and the channel for QS-DNA (b) by spiking  $4 \times 10^3$  copies of QS-DNA into the serum with HBV-DNA ranging from 10 to  $2 \times 10^6$  IU mL<sup>-1</sup> before extraction, and the quantitative relationship between the serum HBV loads (log C) and  $\Delta Ct$  (c).  $\Delta Ct$  was defined as the difference between the Ct values of HBV-DNA and QS-DNA in the reaction system. NTC was no target control, the reaction without a target. N=3.

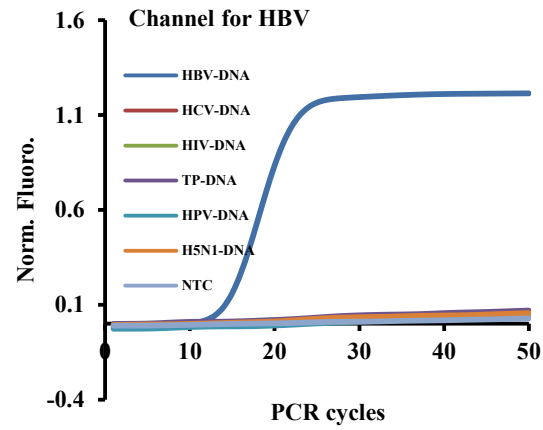

**Fig. S10** Amplification profiles from the channel for HBV-DNA by spiking  $1 \times 10^4$  copies of various plasmid DNAs of other virus genes into the HBV-negative human serum, including HPV, HCV, HIV, TP and H5N1. NTC was no target control, the reaction without a target.

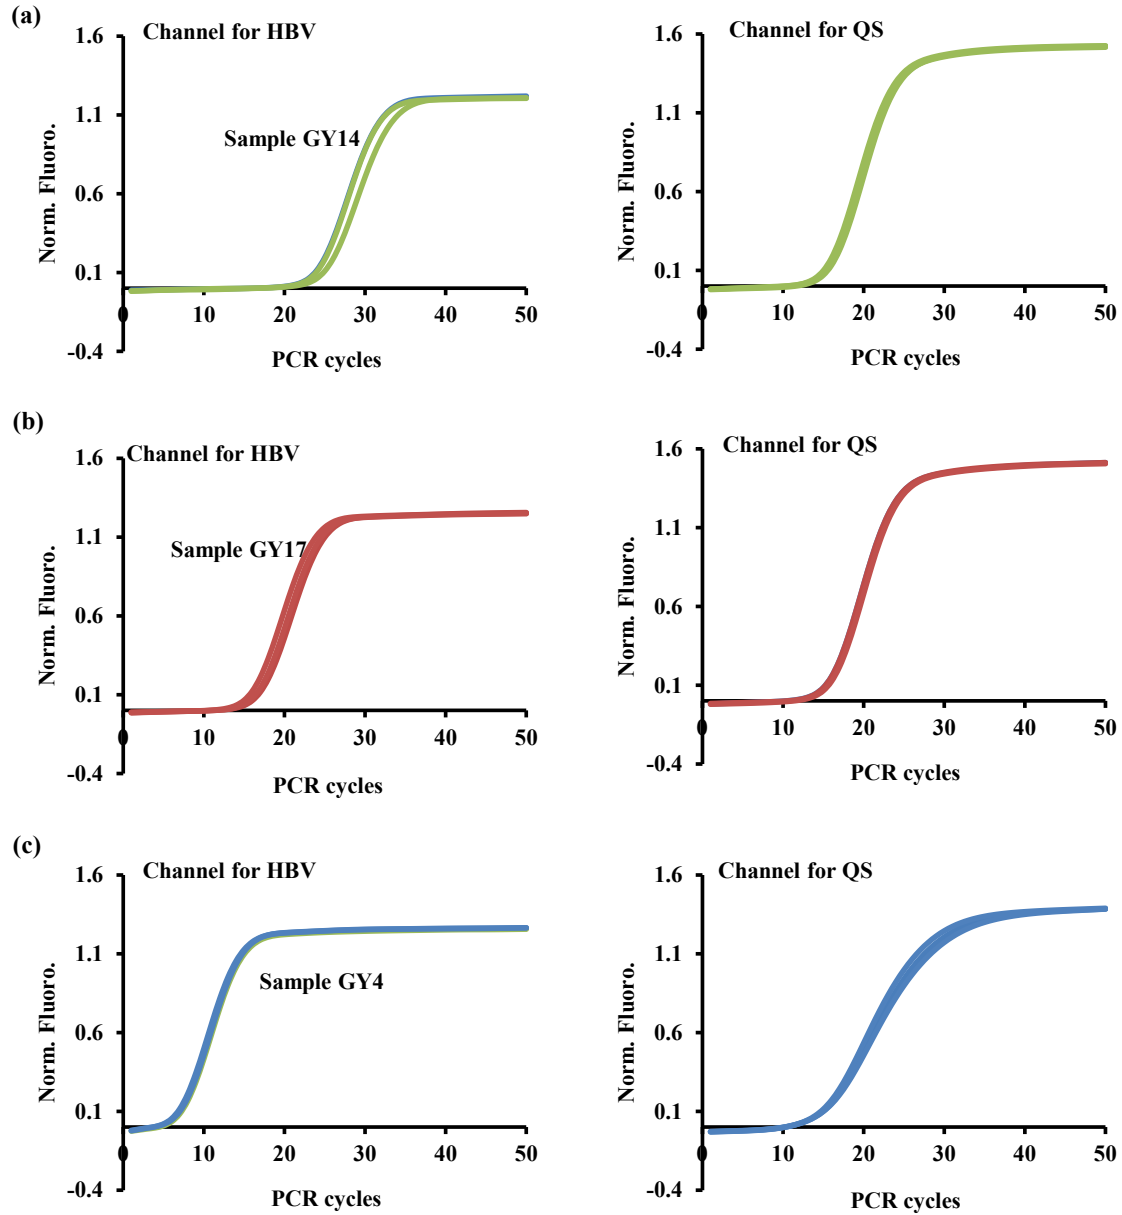

**Fig. S11** Amplification profiles from the channel for HBV-DNA (left side) and the channel for QS-DNA (right side) of clinical samples with relative low (a), middle (b) and high (c) viral load in the reaction system. Sample GY 14 was  $1.26 \times 10^2$  IU mL<sup>-1</sup>, Sample GY 17 was  $1.69 \times 10^5$  IU mL<sup>-1</sup> and Sample GY 4 was  $1.68 \times 10^8$  IU mL<sup>-1</sup>. N=3.

**Table S1. Calculated E values in five separate tests**

| Test* | E     |
|-------|-------|
| 1     | 0.993 |
| 2     | 1.079 |
| 3     | 1.016 |
| 4     | 1.085 |
| 5     | 0.990 |

Note: \*Test 1 and 2 were operated two years ago; test 3, 4 and 5 were operated recently.

**Table S2. Precision of intra-assay for quantifying HBV-DNA**

| $C_{\text{expected}}$<br>(IU mL <sup>-1</sup> ) | 1 <sup>st</sup> day                          |                                   | 2 <sup>nd</sup> day                          |                                   |
|-------------------------------------------------|----------------------------------------------|-----------------------------------|----------------------------------------------|-----------------------------------|
|                                                 | $C_{\text{measured}}$ (IU mL <sup>-1</sup> ) | Log $C_{\text{measured}}$ (CV, %) | $C_{\text{measured}}$ (IU mL <sup>-1</sup> ) | Log $C_{\text{measured}}$ (CV, %) |
| $2 \times 10^4$                                 | $1.7 \times 10^4$                            | 4.22 (2.3)                        | $1.2 \times 10^4$                            | 4.07 (1.9)                        |
| $2 \times 10^3$                                 | $1.6 \times 10^3$                            | 3.20 (1.6)                        | $1.4 \times 10^3$                            | 3.15 (1.7)                        |
| $2 \times 10^2$                                 | $2.5 \times 10^2$                            | 2.38 (3.8)                        | $4.5 \times 10^2$                            | 2.65 (0.9)                        |
| $C_{\text{expected}}$<br>(IU mL <sup>-1</sup> ) | 3 <sup>rd</sup> day                          |                                   | 4 <sup>th</sup> day                          |                                   |
|                                                 | $C_{\text{measured}}$ (IU mL <sup>-1</sup> ) | Log $C_{\text{measured}}$ (CV, %) | $C_{\text{measured}}$ (IU mL <sup>-1</sup> ) | Log $C_{\text{measured}}$ (CV, %) |
| $2 \times 10^4$                                 | $1.2 \times 10^4$                            | 4.07 (2.1)                        | $1.1 \times 10^4$                            | 4.04 (0.64)                       |
| $2 \times 10^3$                                 | $1.2 \times 10^3$                            | 3.04 (4.2)                        | $2.5 \times 10^3$                            | 3.39 (2.3)                        |
| $2 \times 10^2$                                 | $4.3 \times 10^2$                            | 2.62 (3.3)                        | $4.4 \times 10^2$                            | 2.64 (2.9)                        |

**Table S3. Precision of inter-assay for quantifying HBV-DNA**

| $C_{\text{expected}}$ (IU mL <sup>-1</sup> ) | $C_{\text{measured}}$ (IU mL <sup>-1</sup> ) | Log $C_{\text{measured}}$ (CV, %) |
|----------------------------------------------|----------------------------------------------|-----------------------------------|
| $2 \times 10^4$                              | $1.3 \times 10^4$                            | 4.10 (2.5)                        |
| $2 \times 10^3$                              | $1.7 \times 10^3$                            | 3.20 (4.7)                        |
| $2 \times 10^2$                              | $3.9 \times 10^2$                            | 2.57 (5.2)                        |

**Table S4. Ct values of samples tested by sQ-Invader and TaqMan probe-based qPCR**

| Sample* | sQ-Invader (SD) | qPCR (SD)     |
|---------|-----------------|---------------|
| S1      | 17.12 (0.20)    | 27.18 (0.04)  |
| S2      | 13.53 (0.06)    | 24.99 (0.03)  |
| S3      | 8.17 (0.18)     | 18.38 (0.11)  |
| S4      | 5.82 (0.22)     | 15.09 (0.01)  |
| S5      | 11.06 (0.13)    | 21.72 (0.01)  |
| S6      | 23.60 (0.64)    | 35.04 (0.16)  |
| S7      | 19.00 (0.32)    | 31.04 (0.19)  |
| S8      | 15.11 (0.49)    | 26.01 (0.03)  |
| S9      | 9.67 (0.28)     | 20.965 (0.05) |
| S10     | 17.64 (0.51)    | 28.68 (0.10)  |
| S11     | 12.18 (0.04)    | 22.02 (0.02)  |
| S12     | 3.59 (0.12)     | 12.18 (0.06)  |
| S13     | 6.90 (0.01)     | 16.67 (0.17)  |
| S14     | 22.70 (0.68)    | 31.66 (0.16)  |
| S15     | 16.79 (0.21)    | 27.70 (0.10)  |
| S16     | 22.50 (0.34)    | 33.55 (0.65)  |
| S17     | 6.02 (0.08)     | 16.405 (0.02) |

Note: \*Each sample was tested for three times.
